# Supplementary material
Source: publisher site journal article supplement (https://www.dovepress.com/article/165291)
Supplement: Supplementary file 1 [file get_supplementary_file.php%3Ff%3D165291.pdf]

## Supplementary Information

### Decreased survival in patients with carcinoma of axillary tail versus upper outer quadrant breast cancers: A SEER population-based study

Zong-Chao Gou<sup>1,2</sup>, Xi-Yu Liu<sup>1,2</sup>, Yi Xiao<sup>1,2</sup>, Shen Zhao<sup>1,2</sup>, Yi-Zhou Jiang<sup>1,2</sup> and Zhi-Ming Shao<sup>1,2,3</sup>

1 Department of Breast Surgery, Fudan University Shanghai Cancer Center; Cancer Institute, Fudan University Shanghai Cancer Center, 270 Dong-An Road, Shanghai 200032, People's Republic of China

2 Department of Oncology, Shanghai Medical College, Fudan University, P.R. China

3 Institutes of Biomedical Sciences, Fudan University, Shanghai, P.R. China

Shen Zhao and Ding Ma contributed equally to this work.

Zong-Chao Gou and Xi-Yu Liu contributed equally to this work.

#### \*Correspondence to:

Zhi-Ming Shao, MD, PhD or Yi-Zhou Jiang, MD

Email: [zhimingshao@gmail.com](mailto:zhimingshao@gmail.com) or [yizhoujiang@fudan.edu.cn](mailto:yizhoujiang@fudan.edu.cn)

**Running Title:** Decreased survival in patients with carcinoma of axillary tail

- 3 Supplementary Figures
- 3 Supplementary Tables

**Fig. S1**

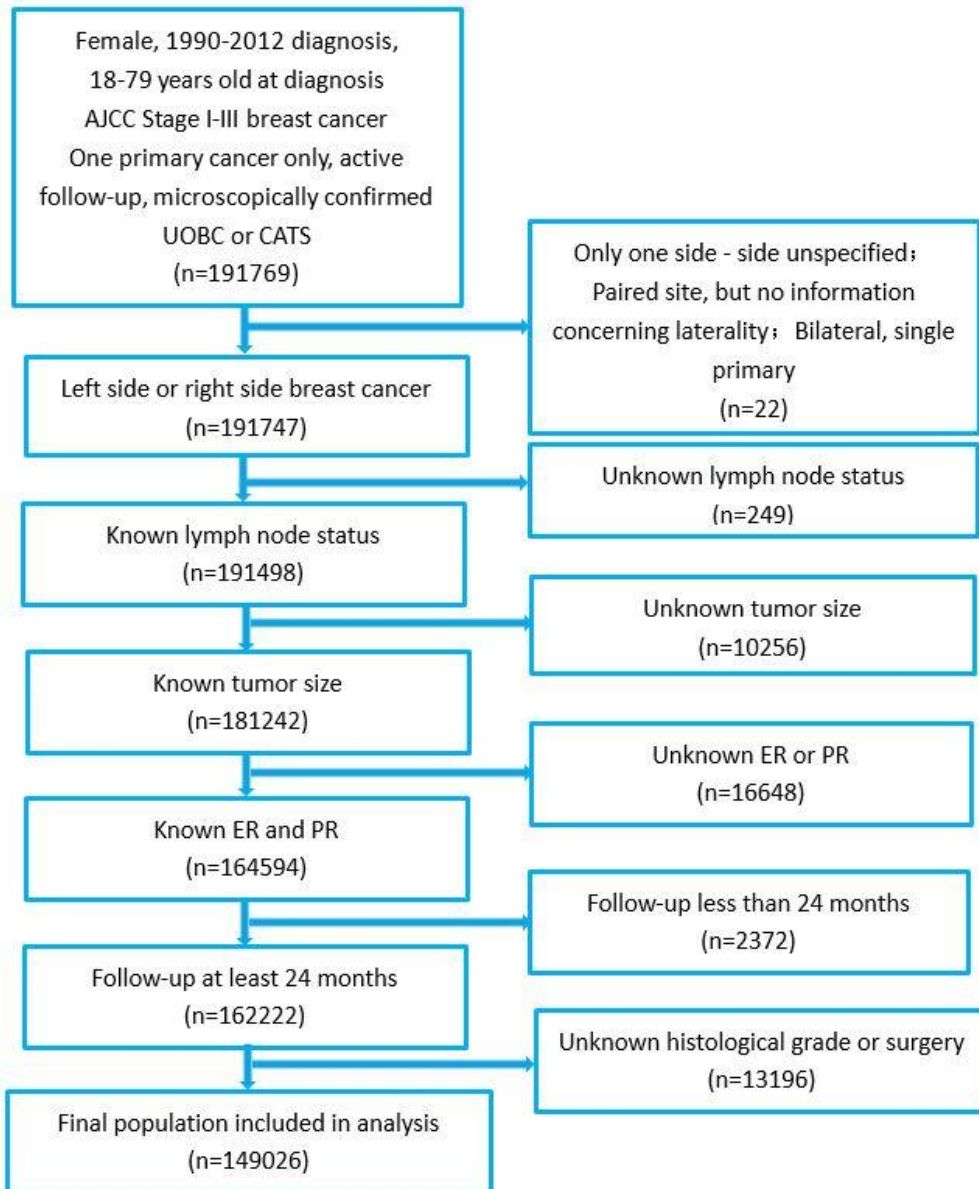

**Fig. S1 Flow diagram for selection of the study cohort.** A total of 149,026 patients (UOBC: n=146,343; CATS: n=2,683) were enrolled in this study.

**Fig. S2**

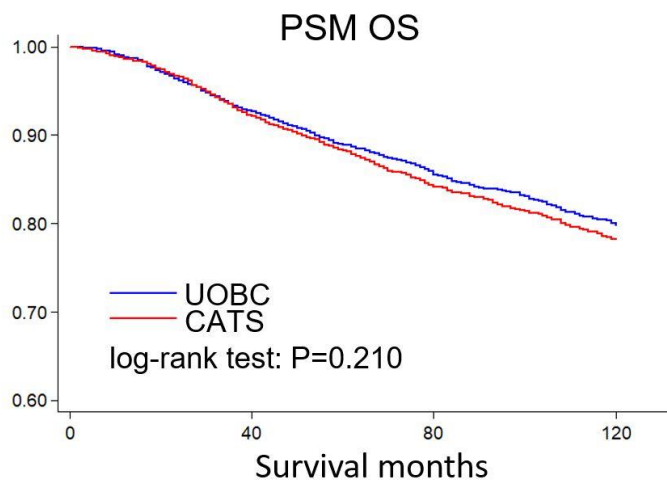

**Fig. S2. Kaplan-Meier plots of 10-year OS comparing 1:1 Matched CATS and UOBC.**

Abbreviations: CATS, carcinoma of the axillary tail of Spence; OS, overall survival; PSM, propensity score matching; UOBC, upper outer quadrant breast cancer.

**Fig. S3**

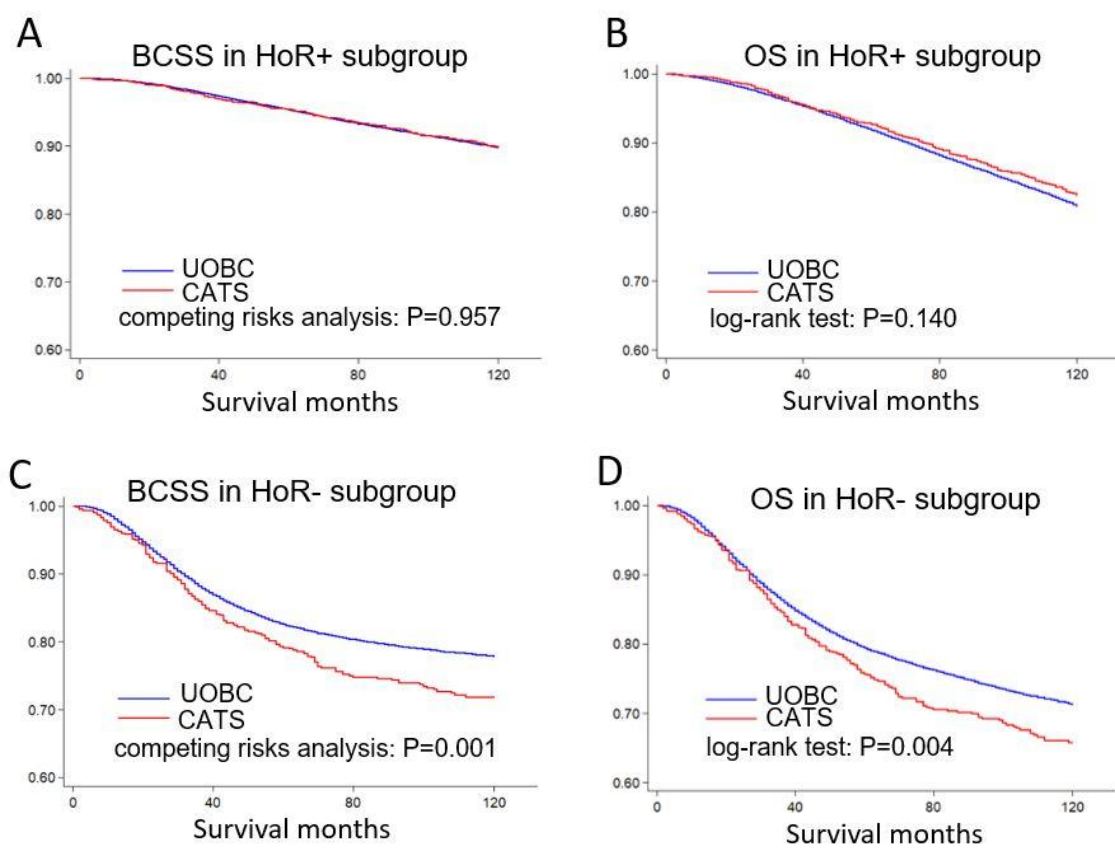

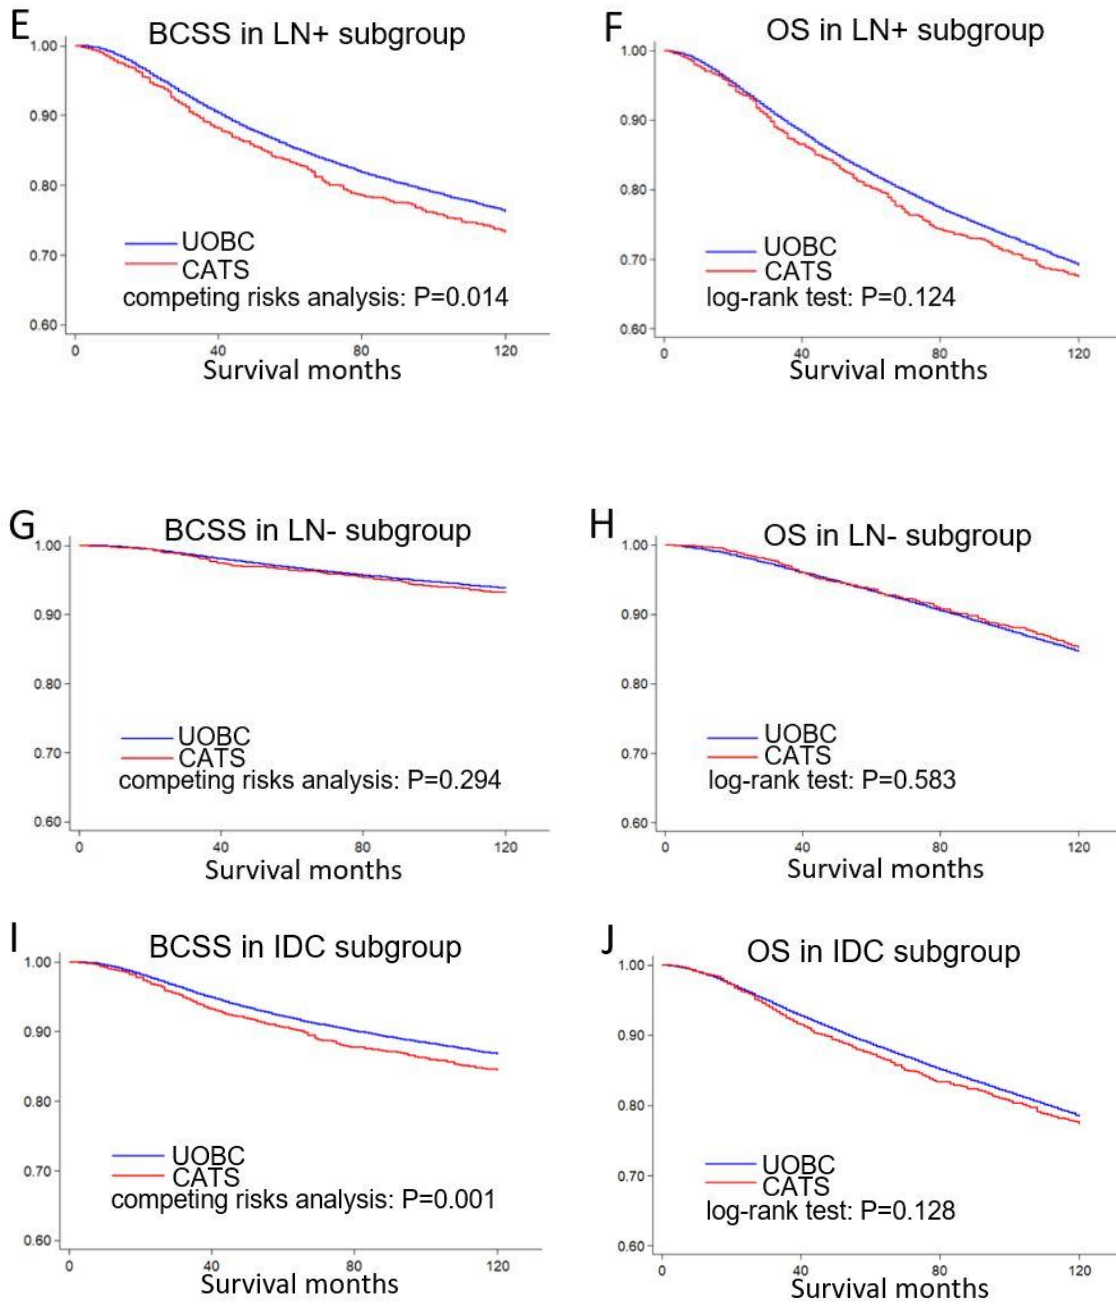

**Fig. S3 Subgroups survival analysis.** BCSS and OS in subgroups of HoR+, HoR-, LN+, LN- and IDC.

Abbreviations: BCSS, breast cancer-specific survival; CATS, carcinoma of the axillary tail of Spence; HoR, hormone receptor; IDC: infiltrating duct carcinoma; LN status, lymph node status; OS, overall survival; UOBC, upper outer quadrant breast cancer.

**Table S1**  
**Univariate Cox regression model analysis of BCSS and OS between CATS**  
**and UOBC.**

| Variables             | BCSS      |           |        | OS        |           |        |
|-----------------------|-----------|-----------|--------|-----------|-----------|--------|
|                       | HR        | 95% CI    | P      | HR        | 95% CI    | P      |
| <b>Year</b>           |           |           |        |           |           |        |
| 1990-1997             | Reference |           |        | Reference |           |        |
| 1998-2005             | 0.62      | 0.59-0.64 | <0.001 | 0.67      | 0.65-0.70 | <0.001 |
| 2006-2012             | 0.46      | 0.44-0.48 | <0.001 | 0.52      | 0.50-0.54 | <0.001 |
| <b>Age</b>            |           |           |        |           |           |        |
| 18-45                 | Reference |           |        | Reference |           |        |
| 46-55                 | 0.71      | 0.68-0.74 | <0.001 | 0.79      | 0.75-0.82 | <0.001 |
| 56-65                 | 0.66      | 0.63-0.69 | <0.001 | 0.93      | 0.90-0.97 | 0.001  |
| 66-79                 | 0.79      | 0.76-0.83 | <0.001 | 1.92      | 1.85-1.99 | <0.001 |
| <b>Race</b>           |           |           |        |           |           |        |
| White                 | Reference |           |        | Reference |           |        |
| Black                 | 1.97      | 1.88-2.06 | <0.001 | 1.70      | 1.64-1.76 | <0.001 |
| Others                | 0.94      | 0.88-1    | 0.040  | 0.79      | 0.75-0.83 | <0.001 |
| <b>Marital status</b> |           |           |        |           |           |        |
| Married               | Reference |           |        | Reference |           |        |
| Not married           | 1.29      | 1.25-1.34 | <0.001 | 1.59      | 1.55-1.63 | <0.001 |
| <b>Location</b>       |           |           |        |           |           |        |
| UOBC                  | Reference |           |        | Reference |           |        |
| CATS                  | 1.20      | 1.08-1.34 | 0.001  | 1.07      | 0.97-1.17 | 0.160  |
| <b>Laterality</b>     |           |           |        |           |           |        |
| Left                  | Reference |           |        | Reference |           |        |
| Right                 | 0.97      | 0.94-1    | 0.090  | 0.97      | 0.95-1.00 | 0.040  |
| <b>Histology</b>      |           |           |        |           |           |        |
| IDC                   | Reference |           |        | Reference |           |        |
| ILC                   | 0.74      | 0.68-0.8  | <0.001 | 0.85      | 0.81-0.90 | <0.001 |
| Others                | 0.80      | 0.76-0.84 | <0.001 | 0.87      | 0.84-0.90 | <0.001 |
| <b>Grade</b>          |           |           |        |           |           |        |
| I                     | Reference |           |        | Reference |           |        |
| II                    | 3.34      | 3.07-3.63 | <0.001 | 1.56      | 1.49-1.63 | <0.001 |
| III and UD*           | 8.77      | 8.09-9.51 | <0.001 | 2.79      | 2.68-2.91 | <0.001 |
| <b>Tumor size</b>     |           |           |        |           |           |        |
| 0-20mm                | Reference |           |        | Reference |           |        |
| 21-50mm               | 3.69      | 3.56-3.83 | <0.001 | 2.24      | 2.18-2.31 | <0.001 |
| >50mm                 | 7.91      | 7.52-8.32 | <0.001 | 4.17      | 4.00-4.35 | <0.001 |
| <b>LN status</b>      |           |           |        |           |           |        |
| Negative              | Reference |           |        | Reference |           |        |
| Positive              | 4.42      | 4.26-4.58 | <0.001 | 2.40      | 2.34-2.47 | <0.001 |
| <b>HoR</b>            |           |           |        |           |           |        |

|                     |           |           |        |           |           |        |
|---------------------|-----------|-----------|--------|-----------|-----------|--------|
| Negative            | Reference |           |        | Reference |           |        |
| Positive            | 0.35      | 0.34-0.36 | <0.001 | 0.52      | 0.50-0.53 | <0.001 |
| <b>Surgery</b>      |           |           |        |           |           |        |
| Lumpectomy          | Reference |           |        | Reference |           |        |
| Mastectomy          | 2.46      | 2.38-2.54 | <0.001 | 2.03      | 1.98-2.08 | <0.001 |
| <b>Radiation</b>    |           |           |        |           |           |        |
| Yes                 | Reference |           |        | Reference |           |        |
| No                  | 2.45      | 2.16-2.78 | <0.001 | 2.48      | 2.24-2.74 | <0.001 |
| <b>Chemotherapy</b> |           |           |        |           |           |        |
| Yes                 | Reference |           |        | Reference |           |        |
| No/Unknown          | 0.42      | 0.41-0.44 | <0.001 | 0.86      | 0.84-0.88 | <0.001 |

Abbreviations: BCSS, breast cancer-specific survival; CATS, carcinoma of the axillary tail of Spence; HoR, hormone receptor; LN status, lymph node status; OS, overall survival; UD, undifferentiated; UOBC, upper outer quadrant breast cancer.



**Table S2**  
**Characteristics of Patients 1:1 Matched CATS vs UOBC**

|                          | <b>CATS</b><br><b>(n=2,585)</b> | <b>UOBC</b><br><b>(n=2,585)</b> | <b>P</b> |
|--------------------------|---------------------------------|---------------------------------|----------|
| <b>Year, %</b>           |                                 |                                 | 0.999    |
| 1990-1997                | 15.2                            | 15.2                            |          |
| 1998-2005                | 43                              | 43                              |          |
| 2006-2012                | 41.8                            | 41.8                            |          |
| <b>Age, %</b>            |                                 |                                 | 0.998    |
| 18-45                    | 26.7                            | 26.7                            |          |
| 46-55                    | 27.9                            | 28.1                            |          |
| 56-65                    | 22.2                            | 22.3                            |          |
| 66-79                    | 23.1                            | 22.9                            |          |
| <b>Race, %</b>           |                                 |                                 | 0.955    |
| White                    | 80.8                            | 80.9                            |          |
| Black                    | 13.4                            | 13.4                            |          |
| Others                   | 5.9                             | 5.7                             |          |
| <b>Marital status, %</b> |                                 |                                 | 0.837    |
| Married                  | 66.2                            | 65.9                            |          |
| Not married              | 33.8                            | 34.1                            |          |
| <b>Laterality, %</b>     |                                 |                                 | 0.781    |
| Left                     | 49.5                            | 49.1                            |          |
| Right                    | 50.5                            | 50.9                            |          |
| <b>Histology, %</b>      |                                 |                                 | 0.988    |
| IDC                      | 78.8                            | 79                              |          |
| ILC                      | 5.2                             | 5.1                             |          |
| Others                   | 16                              | 15.9                            |          |
| <b>Grade, %</b>          |                                 |                                 | 0.992    |
| I                        | 19.3                            | 19.3                            |          |
| II                       | 37.2                            | 37.3                            |          |
| III and UD               | 43.6                            | 43.4                            |          |

|                      |      |      |       |
|----------------------|------|------|-------|
| <b>Tumor size, %</b> |      |      | 0.825 |
| 0-20mm               | 68.1 | 68.2 |       |
| 21-50mm              | 28.3 | 28.5 |       |
| >50mm                | 3.6  | 3.3  |       |
| <b>LN status, %</b>  |      |      | 0.977 |
| Negative             | 59.8 | 59.8 |       |
| Positive             | 40.2 | 40.2 |       |
| <b>HoR, %</b>        |      |      | 0.825 |
| Negative             | 26.2 | 26   |       |
| Positive             | 73.8 | 74   |       |
| <b>Surgery, %</b>    |      |      | 0.925 |
| Lumpectomy           | 72.9 | 72.8 |       |
| Mastectomy           | 27.1 | 27.2 |       |

Abbreviations: CATS, carcinoma of the axillary tail of Spence; HoR, hormone receptor; LN examined, number of examined lymph node; LN positive, number of positive lymph node; LNR, lymph node ratio; LN status, lymph node status; OS, overall survival; UD, undifferentiated; UOBC, upper outer quadrant breast cancer.

**Table S3**  
**Univariate logistic regression analysis on LN metastasis.**

|                       | OR        | 95% CI    | P     |
|-----------------------|-----------|-----------|-------|
| <b>Year</b>           |           |           |       |
| 1990-1997             | Reference |           |       |
| 1998-2005             | 0.92      | 0.89-0.96 | <0.01 |
| 2006-2012             | 0.81      | 0.78-0.83 | <0.01 |
| <b>Age</b>            |           |           |       |
| 18-45                 | Reference |           |       |
| 46-55                 | 0.73      | 0.70-0.75 | <0.01 |
| 56-65                 | 0.57      | 0.55-0.59 | <0.01 |
| 66-79                 | 0.44      | 0.43-0.45 | <0.01 |
| <b>Race</b>           |           |           |       |
| White                 | Reference |           |       |
| Black                 | 1.43      | 1.38-1.48 | <0.01 |
| Others                | 1.00      | 0.97-1.05 | 0.77  |
| <b>Marital status</b> |           |           |       |
| Married               | Reference |           |       |
| Not married           | 1.01      | 0.99-1.04 | 0.20  |
| <b>Location</b>       |           |           |       |
| UOBC                  | Reference |           |       |
| CATS                  | 1.17      | 1.08-1.26 | <0.01 |
| <b>Laterality</b>     |           |           |       |
| Left                  | Reference |           |       |
| Right                 | 0.99      | 0.97-1.01 | 0.27  |
| <b>Histology</b>      |           |           |       |
| IDC                   | Reference |           |       |
| ILC                   | 0.96      | 0.92-1.00 | 0.08  |
| Others                | 0.83      | 0.80-0.85 | <0.01 |
| <b>Grade</b>          |           |           |       |
| I                     | Reference |           |       |

|                   |           |           |       |
|-------------------|-----------|-----------|-------|
| II                | 2.28      | 2.21-2.36 | <0.01 |
| III and UD        | 3.67      | 3.55-3.79 | <0.01 |
| <b>Tumor size</b> |           |           |       |
| 0-20mm            | Reference |           |       |
| 21-50mm           | 3.69      | 3.61-3.78 | <0.01 |
| >50mm             | 9.35      | 8.87-9.86 | <0.01 |
| <b>HoR</b>        |           |           |       |
| Negative          | Reference |           |       |
| Positive          | 0.73      | 0.72-0.75 | <0.01 |

Abbreviations: BCSS, breast cancer-specific survival; CATS, carcinoma of the axillary tail of Spence; HoR, hormone receptor; LN, lymph node; OS, overall survival; UD, undifferentiated; UOBC, upper outer quadrant breast cancer.
